# Supplementary material for: Primary care system-level training and support programme for the secondary prevention of domestic violence and abuse: a cost-effectiveness feasibility model
Source: PubMed Central journal article supplement (PMC10773355; doi:10.1136/bmjopen-2022-071300), 2024-01-06
Supplement: bmjopen-2022-071300supp001.pdf [file bmjopen-2022-071300supp001.pdf]

**Primary care system-level training and support programme for the secondary prevention of domestic violence and abuse: a cost-effectiveness feasibility model**

Madeleine Cochrane, Eszter Szilassy, Caroline Coope, Elizabeth Emsley, Medina Johnson, Gene Feder and Estela Capelas Barbosa

**Table S1. Adult's model input parameters: probabilities; utilities; and, costs.**

| Parameter                                                                         | Base case value | Lower limit | Upper limit | Distribution | Source     |
|-----------------------------------------------------------------------------------|-----------------|-------------|-------------|--------------|------------|
| <i>Probabilities</i>                                                              |                 |             |             |              |            |
| Prevalence of DVA in adults (males and females) – aged 16 to 65                   | 0.055           | 0.036       | 0.073       | Beta         | ONS, 2020b |
| <i>Starting distribution for patients who are abused</i>                          |                 |             |             |              |            |
| Abused and identified, seeing advocate                                            | 0.003           | 0           | 0.0066      | Uniform      | *          |
| Abused and identified, not seeing advocate                                        | 0.033           | 0           | 0.0660      | Uniform      | *          |
| Abused but not identified                                                         | 0.964           | -           | -           | Uniform      | Complement |
| <i>Transition probabilities</i>                                                   |                 |             |             |              |            |
| Not abused to Abused but not identified                                           | 0.0037          | 0.0004      | 0.0106      | Dirichlet    | *          |
| Not abused to Dead                                                                | 0.0052          | 0.0027      | 0.0087      | Dirichlet    | ONS, 2020b |
| Stay in Not abused                                                                | 0.9911          | -           | -           | Dirichlet    | Complement |
| Abused but not identified to Not abused (control)                                 | 0.0500          | 0.0412      | 0.0596      | Dirichlet    | *          |
| Abused but not identified to Abused and identified, not seeing advocate (control) | 0.0091          | 0.0055      | 0.0135      | Dirichlet    | IRIS data  |

|                                                                                        |        |        |        |           |                     |
|----------------------------------------------------------------------------------------|--------|--------|--------|-----------|---------------------|
| Abused but not identified to Abused and identified, seeing advocate (control)          | 0.0226 | 0.0168 | 0.0293 | Dirichlet | IRIS data           |
| Abused but not identified to Dead (control)                                            | 0.0055 | 0.0029 | 0.0091 | Dirichlet | ONS, 2020b          |
| Stay in Abused but not identified (control)                                            | 0.9131 | -      | -      | Dirichlet | Complement          |
| Abused but not identified to Not abused (intervention)                                 | 0.0500 | 0.0412 | 0.0596 | Dirichlet | *                   |
| Abused but not identified to Abused and identified, not seeing advocate (intervention) | 0.0374 | 0.0298 | 0.0458 | Dirichlet | IRIS+ data          |
| Abused but not identified to Abused and identified, seeing advocate (intervention)     | 0.0312 | 0.0243 | 0.0390 | Dirichlet | IRIS+ data          |
| Abused but not identified to Dead (intervention)                                       | 0.0055 | 0.0029 | 0.0091 | Dirichlet | ONS, 2020B          |
| Stay in Abused but not identified (intervention)                                       | 0.8762 | -      | -      | Dirichlet | Complement          |
| Abused and identified, seeing advocate to Not abused                                   | 0.1408 | 0.0707 | 0.2301 | Dirichlet | (Taft et al., 2011) |
| Abused and identified, seeing advocate to Dead                                         | 0.0052 | 0.0000 | 0.0299 | Dirichlet | ONS, 2020b          |
| Stay in Abused and identified, seeing advocate                                         | 0.854  | -      | -      | Dirichlet | Complement          |
| Abused and identified, not seeing advocate to Not abused                               | 0.0781 | 0.0136 | 0.1912 | Dirichlet | (Taft et al., 2011) |
| Abused and identified, not seeing advocate to Dead                                     | 0.0052 | 0.0000 | 0.0424 | Dirichlet | ONS, 2020b          |

|                                                                    |        |       |        |           |                       |
|--------------------------------------------------------------------|--------|-------|--------|-----------|-----------------------|
| Stay in Abused and identified, not seeing advocate                 | 0.9167 | -     | -      | Dirichlet | Complement            |
| <b>Utilities</b>                                                   |        |       |        |           |                       |
| Not abused (adults)                                                | 0.850  | 0.840 | 0.860  | Beta      | (Kind et al., 1999)   |
| Abused but not identified (women)                                  | 0.656  | 0.522 | 0.749  | Beta      | Assumption            |
| Abused but not identified (men)                                    | 0.626  | 0.500 | 0.744  | Beta      | Assumption            |
| Abused and identified, seeing advocate (women)                     | 0.659  | 0.518 | 0.782  | Beta      | IRIS+ data            |
| Abused and identified, seeing advocate (men)                       | 0.701  | 0.555 | 0.828  | Beta      | IRIS+ data            |
| Abused and identified, not seeing advocate (women)                 | 0.656  | 0.522 | 0.749  | Beta      | IRIS+ data            |
| Abused and identified, not seeing advocate (men)                   | 0.626  | 0.500 | 0.744  | Beta      | IRIS+ data            |
| <b>Costs (2019/20£)</b>                                            |        |       |        |           |                       |
| Costs of the intervention, per patient exposed to DV, per 6 months | £0.75  | £0.02 | £2.73  | Gamma     | IRIS+ budget          |
| Cost of onward referral, once                                      | £658   | £11   | £1908  | Gamma     | IRIS+ data; IRIS data |
| Cost of Abused but not identified (adults)                         | £4858  | £123  | £17919 | Gamma     | (Oliver et al., 2019) |
| Weighted costs Abused and identified, seeing advocate              | 1      | 0.75  | 1.25   | Gamma     | Assumption            |
| Weighted costs Abused and identified, not seeing advocate          | 1      | 0.9   | 1.1    | Gamma     | Assumption            |

Costs are in 2019/20 UK£.

\* Internal calculation based on model calibration.

± Excludes the cost of harms, which in this modelled are measured as benefit

**Table S2. Children's model input parameters: probabilities; utilities; and, costs.**

| Parameter                                                | Base case value | Lower limit | Upper limit | Distribution | Source                 |
|----------------------------------------------------------|-----------------|-------------|-------------|--------------|------------------------|
| <i>Probabilities</i>                                     |                 |             |             |              |                        |
| Prevalence of children exposed to DVA                    | 0.080           | 0.040       | 0.140       | Beta         | (Gilbert et al., 2009) |
| <i>Starting distribution for patients who are abused</i> |                 |             |             |              |                        |
| Abused and identified, seeing advocate                   | 0.003           | 0           | 0.0066      | Uniform      | *                      |
| Abused and identified, not seeing advocate               | 0.033           | 0           | 0.0660      | Uniform      | *                      |
| Abused but not identified                                | 0.964           | -           | -           | Uniform      | Complement             |
| <i>Transition probabilities</i>                          |                 |             |             |              |                        |
| Not abused to Abused but not identified                  | 0.0037          | 0.0004      | 0.0106      | Dirichlet    | *                      |
| Not abused to Dead                                       | 0.0052          | 0.0027      | 0.0087      | Dirichlet    | ONS, 2020b             |
| Stay in Not abused                                       | 0.9911          | -           | -           | Dirichlet    | Complement             |
| Abused but not identified to Not abused (control)        | 0.0500          | 0.0412      | 0.0596      | Dirichlet    | *                      |

|                                                                                        |        |        |        |           |                     |
|----------------------------------------------------------------------------------------|--------|--------|--------|-----------|---------------------|
| Abused but not identified to Abused and identified, not seeing advocate (control)      | 0.0091 | 0.0055 | 0.0135 | Dirichlet | IRIS data           |
| Abused but not identified to Abused and identified, seeing advocate (control)          | 0.0226 | 0.0168 | 0.0293 | Dirichlet | IRIS data           |
| Abused but not identified to Dead (control)                                            | 0.0055 | 0.0029 | 0.0091 | Dirichlet | ONS, 2020b          |
| Stay in Abused but not identified (control)                                            | 0.9131 | -      | -      | Dirichlet | Complement          |
| Abused but not identified to Not abused (intervention)                                 | 0.0500 | 0.0412 | 0.0596 | Dirichlet | *                   |
| Abused but not identified to Abused and identified, not seeing advocate (intervention) | 0.0374 | 0.0298 | 0.0458 | Dirichlet | IRIS+ data          |
| Abused but not identified to Abused and identified, seeing advocate (intervention)     | 0.0312 | 0.0243 | 0.0390 | Dirichlet | IRIS+ data          |
| Abused but not identified to Dead (intervention)                                       | 0.0055 | 0.0029 | 0.0091 | Dirichlet | ONS, 2020b          |
| Stay in Abused but not identified (intervention)                                       | 0.8762 | -      | -      | Dirichlet | Complement          |
| Abused and identified, seeing advocate to Not abused                                   | 0.1408 | 0.0707 | 0.2301 | Dirichlet | (Taft et al., 2011) |
| Abused and identified, seeing advocate to Dead                                         | 0.0052 | 0.0000 | 0.0299 | Dirichlet | ONS, 2020b          |
| Stay in Abused and identified, seeing advocate                                         | 0.854  | -      | -      | Dirichlet | Complement          |

|                                                                    |        |        |        |           |                            |
|--------------------------------------------------------------------|--------|--------|--------|-----------|----------------------------|
| Abused and identified, not seeing advocate to Not abused           | 0.0781 | 0.0136 | 0.1912 | Dirichlet | (Taft et al., 2011)        |
| Abused and identified, not seeing advocate to Dead                 | 0.0052 | 0.0000 | 0.0424 | Dirichlet | ONS, 2020b                 |
| Stay in Abused and identified, not seeing advocate                 | 0.9167 | -      | -      | Dirichlet | Complement                 |
| <b><i>Utilities</i></b>                                            |        |        |        |           |                            |
| Not abused (children)                                              | 0.950  | 0.940  | 0.959  | Beta      | (Kind et al., 1999)        |
| Abused but not identified (children)                               | 0.801  | 0.623  | 0.932  | Beta      | Assumption                 |
| Abused and identified, seeing advocate (children)                  | 0.804  | 0.625  | 0.935  | Beta      | IRIS+ data                 |
| Abused and identified, not seeing advocate (children)              | 0.801  | 0.623  | 0.932  | Beta      | IRIS+ data                 |
| <b><i>Costs (2019/20£)</i></b>                                     |        |        |        |           |                            |
| Costs of the intervention, per patient exposed to DV, per 6 months | £0.75  | £0.02  | £2.73  | Gamma     | IRIS+ budget               |
| Cost of onward referral, once                                      | £658   | £11    | £1908  | Gamma     | IRIS+ data; IRIS data      |
| Cost of Abused but not identified (children)                       | £1950  | £1000  | £2500  | Gamma     | (Pro Bono Economics, 2018) |
| Weighted costs Abused and identified, seeing advocate              | 1      | 0.75   | 1.25   | Gamma     | Assumption                 |
| Weighted costs Abused and identified, not seeing advocate          | 1      | 0.9    | 1.1    | Gamma     | Assumption                 |

Costs are in 2019/20 UK£. \* Internal calculation based on model calibration. ± Excludes the cost of harms, which in this modelled are measured as benefit
